1 **Title:** The scheduling of adolescence with Netrin-1 and UNC5C

2 **Authors**

3 Daniel Hoops<sup>1,2</sup>, Robert F. Kyne<sup>3</sup>, Samer Salameh<sup>2,4</sup>, Del MacGowan<sup>2,4</sup>, Radu G. Avramescu<sup>1,2</sup>,

4 Elise Ewing<sup>2,4</sup>, Alina T. He<sup>2,4</sup>, Taylor Orsini<sup>2,4</sup>, Anais Durand<sup>2,4</sup>, Christina Popescu<sup>2,4</sup>, Janet M.

5 Zhao<sup>2,4</sup>, Kelcie C. Schatz<sup>5</sup>, LiPing Li<sup>5</sup>, Quinn E. Carroll<sup>5</sup>, Guofa Liu<sup>6</sup>, Matthew J. Paul<sup>3,5</sup> #, Cecilia

6 Flores<sup>1,2,7,8,#</sup> \*

7 **Affiliations**

8 1 Department of Psychiatry, McGill University, Montréal, Quebec, Canada

9 2 Douglas Mental Health University Institute, Montréal, Quebec, Canada

10 3 Neuroscience Program, University at Buffalo, SUNY, New York, USA

11 4 Integrated Program in Neuroscience, McGill University, Montréal, QC, Canada

12 5 Department of Psychology, University at Buffalo, SUNY, New York, USA

13 6 Department of Biological Sciences, University of Toledo, Ohio, USA

14 7 Department of Neurology and Neurosurgery, McGill University, Montréal, Quebec, Canada

15 8 Ludmer Centre for Neuroinformatics & Mental Health, McGill University, Montréal, Quebec,  
16 Canada

17 # Co-senior authors

18 \* Corresponding author C. Flores: [cecilia.flores@mcgill.ca](mailto:cecilia.flores@mcgill.ca)

19

20 **Keywords**

21 dopamine, prefrontal cortex, inhibitory control, axon guidance, puberty, sex differences

22

## 23 **Abstract**

24 Dopamine axons are the only axons known to grow during adolescence. Here, using rodent  
25 models, we examined how two proteins, Netrin-1 and its receptor, UNC5C, guide dopamine  
26 axons towards the prefrontal cortex and shape behaviour. We demonstrate in mice (*Mus*  
27 *musculus*) that dopamine axons reach the cortex through a transient gradient of Netrin-1  
28 expressing cells – disrupting this gradient reroutes axons away from their target. Using a  
29 seasonal model (Siberian hamsters; *Phodopus sungorus*) we find that mesocortical dopamine  
30 development can be regulated by a natural environmental cue (daylength) in a sexually  
31 dimorphic manner – delayed in males, but advanced in females. The timings of dopamine axon  
32 growth and UNC5C expression are always phase-locked. Adolescence is an ill-defined,  
33 transitional period; we pinpoint neurodevelopmental markers underlying this period.

## 34 **Introduction**

35 Adolescence is a critical developmental period involving dramatic changes in behaviour and  
36 brain anatomy. The prefrontal cortex, the brain region responsible for our most complex  
37 cognitive functions, is still establishing connections during this time (Gogtay et al., 2004;  
38 Petanjek et al., 2011; Sowell et al., 2004). The trajectory of prefrontal cortex development in  
39 adolescence determines the vulnerability or resilience of individuals to adolescent-onset  
40 psychiatric diseases (Fuhrmann et al., 2015; Keshavan et al., 2014; Kessler et al., 2007, 2005;  
41 Lee et al., 2014). The age at which this adolescent development occurs therefore represents a  
42 critical window during which the brain is particularly susceptible to environmental influences.  
43 Traditionally, the onset of adolescence is thought to coincide with puberty (Hollenstein and

44 Loughheed, 2013). In humans, the age of pubertal onset has been advancing throughout the  
45 19<sup>th</sup>, 20<sup>th</sup> and 21<sup>st</sup> centuries, and environmental influences, such as nutrition, can pathologically  
46 alter the age of puberty (Wolf and Long, 2016). However, it remains entirely unknown whether  
47 the neural and cognitive maturational processes of adolescence can also be plastic. Here we  
48 examine how the timing of certain adolescent developmental processes are programmed, and  
49 whether this timing can be plastic in response to a natural environmental cue, in parallel with  
50 pubertal plasticity.

51 Dopamine innervation to the prefrontal cortex increases substantially across adolescence, and  
52 psychopathologies of adolescent origin prominently feature dopamine dysfunction. Evidence  
53 continues to emerge that protracted dopamine innervation is a key neural process underlying  
54 the cognitive and behavioural changes that characterize adolescence (Larsen and Luna, 2018).  
55 The mesocorticolimbic dopamine system – which includes the prefrontal cortex – is unique  
56 because not only are connections being formed and lost during adolescence, but there is also  
57 long-distance displacement of dopamine axons between brain regions. At the onset of  
58 adolescence, both mesolimbic and mesocortical dopamine axons innervate the nucleus  
59 accumbens in rodents, but the mesocortical axons leave the accumbens and grow towards the  
60 prefrontal cortex during adolescence and early adulthood (Hoops et al., 2018; Reynolds et al.,  
61 2018a). This is the only known case of axons growing from one brain region to another so late  
62 during development (Hoops and Flores, 2017).

63 The prolonged growth trajectory renders mesocortical dopamine axons particularly vulnerable  
64 to disruption. Environmental insults during adolescence (e.g. drug abuse) alter the extent and  
65 organization of dopamine innervation in the prefrontal cortex, leading to behavioural and

66 cognitive changes in mice throughout adulthood (Drzewiecki and Juraska, 2020; Hoops and  
67 Flores, 2017; Reynolds and Flores, 2021). These changes often involve cognitive control, a  
68 prefrontal function that develops in parallel with dopamine innervation to the cortex in  
69 adolescence (Luna et al., 2015). Disruption of dopamine innervation frequently seems to result  
70 in “immature” cognitive control persisting through adulthood (Larsen and Luna, 2018).

71 Here, we examine the guidance of growing dopamine axons to the prefrontal cortex, and its  
72 timing. The guidance cue molecule Netrin-1, upon interacting with its receptor DCC, determines  
73 *which* dopamine axons establish connections in the nucleus accumbens and which ones leave  
74 this region to grow to the prefrontal cortex (Hoops and Flores, 2017; Reynolds and Flores,  
75 2021). We hypothesized that the answers to *how* and *when* this extraordinary developmental  
76 feat is achieved may also lie in the Netrin-1 signalling system.

### 77 **Part 1: Netrin-1 “paves the way” for dopamine axons in adolescence**

78 To identify the route by which dopamine axons grow from the nucleus accumbens to the  
79 medial prefrontal cortex, we visualized dopamine axons in the adult mouse forebrain. We  
80 observed that dopamine axons medial to the nucleus accumbens occupy a distinct area and are  
81 oriented dorsally towards the cortex (Figure 1A,B). Individual fibres can be seen crossing the  
82 boundary of the nucleus accumbens shell and joining these dorsally-oriented axons (Figure 1C).  
83 We hypothesized that these are the fibres that grow to the prefrontal cortex during  
84 adolescence. If this is correct, the number of dopamine axons oriented dorsally towards the  
85 medial prefrontal cortex should continue to increase until adulthood. To test this, we used a  
86 modified unbiased stereological approach (Kim et al., 2011) where axons are counted only if

87 they crossed the upper and lower bounds of a counting probe. We also measured the average  
88 width of the area these axons occupy. We found, in both male and female mice, that the  
89 density of dopamine axons does not change between adolescence (21 days old) and adulthood  
90 (75 days old; Figure 1D). However, the width of the area that dopamine axons occupy does  
91 change, increasing between adolescence and adulthood (Figure 1E). These results indicate that  
92 the total number of dopamine axons passing through this area increases over adolescence and  
93 that dopamine axons grow to the medial prefrontal cortex via this route.

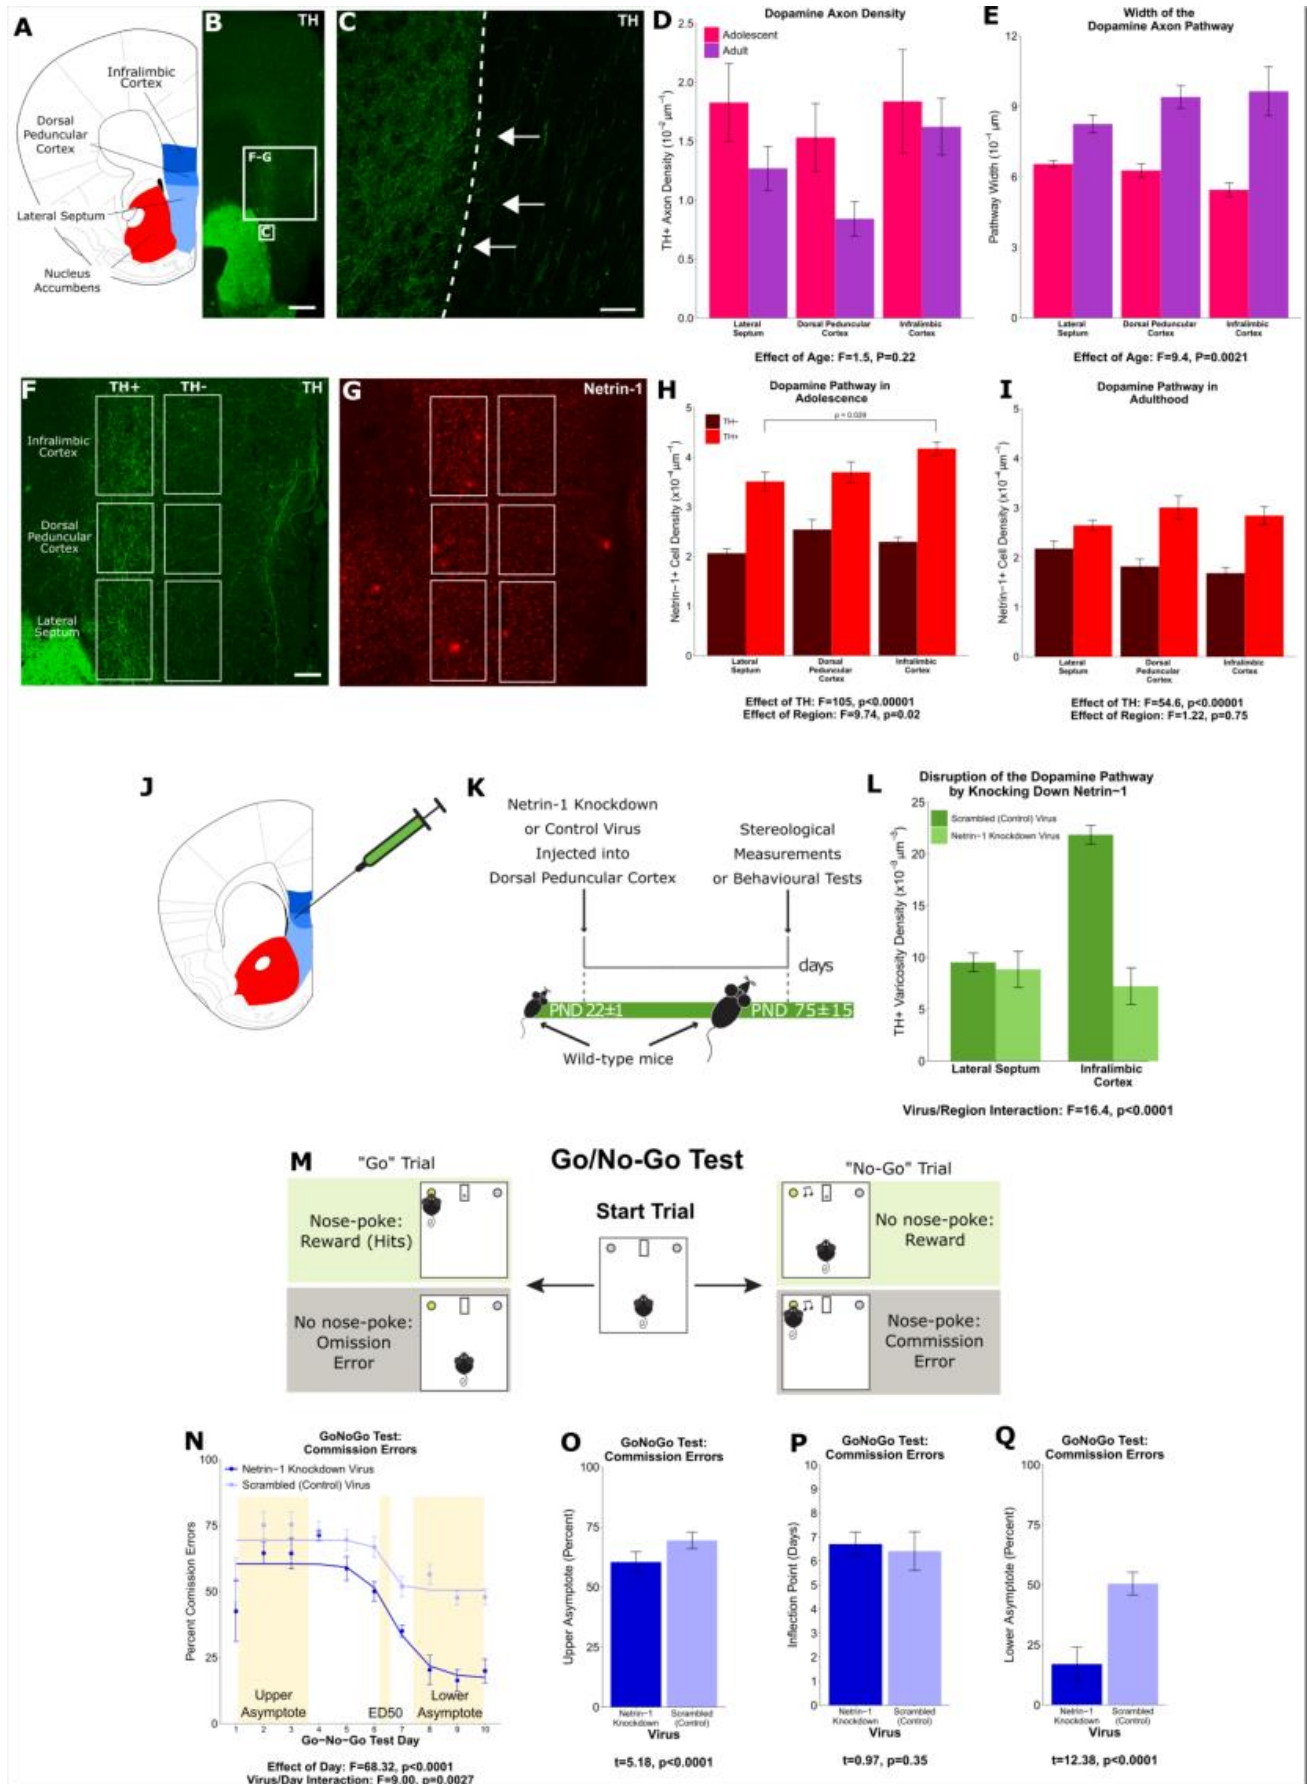

95 **Figure 1.** A “pathway” of Netrin-1 expressing cells “paves the way” for dopamine axons growing from the nucleus  
96 accumbens to the medial prefrontal cortex during adolescence. **A,** The brain regions containing the of dopamine  
97 fibres passing to the medial prefrontal cortex are highlighted in a line drawing of a coronal mouse brain section  
98 derived from Paxinos and Franklin (Paxinos and Franklin, 2013). **B,** An image of a coronal section through the  
99 forebrain of an adult mouse at low magnification (4x). Green fluorescence indicates immunostaining for tyrosine  
100 hydroxylase (TH), used here as a marker for dopamine. The smaller and larger white squares indicate the regions  
101 enlarged in panel C and panels F & G, respectively. Scale bar = 500  $\mu\text{m}$ . **C,** The nucleus accumbens (left of the  
102 dotted line) is densely packed with TH+ axons (in green). Some of these TH+ axons can be observed extending from  
103 the nucleus accumbens medially towards TH+ fibres oriented dorsally towards the medial prefrontal cortex (white  
104 arrows). Scale bar = 10  $\mu\text{m}$ . **D,** Modified stereological quantification revealed no significant difference in TH+ axon  
105 density between adolescence (21 days old) and adulthood (75 days old). Mixed-effects ANOVA, effect of age:  
106  $F=1.53$ ,  $p=0.22$ ; region by age interaction:  $F=1.44$ ,  $p=0.49$ . **E,** The average width of the area that dopamine axons  
107 occupy increased significantly from adolescence to adulthood, revealing that there is an increase in the total  
108 number of fibres passing to the medial prefrontal cortex during this period. Mixed-effects ANOVA, effect of age:  
109  $F=9.45$ ,  $p=0.0021$ ; region by age interaction:  $F=5.74$ ,  $p=0.057$ . **F,** In order to quantify the Netrin-1 positive cells  
110 along the TH+ fibre pathway, the pathway was contoured in each region, and a contour of equal area was placed  
111 medial to the dopamine pathway as a negative control. Scale bar = 200  $\mu\text{m}$ . **G,** Using quantitative stereology,  
112 Netrin-1 positive cell density was determined along and adjacent to the pathway for each region. Red fluorescence  
113 indicates immunostaining for Netrin-1. **H,** In adolescent mice there are more Netrin-1 positive cells along the fibres  
114 expressing TH (“TH+”) than medial to them (“TH-”). This is what we refer to as the “Netrin-1 pathway”. Along the  
115 pathway, there is a significant increase in Netrin-1 positive cell density in regions closer to the medial prefrontal  
116 cortex, the innervation target. Mixed-effects ANOVA, effect of TH:  $F=105$ ,  $p<0.0001$ . Effect of region:  $F=9.74$ ,  
117  $p=0.021$ . A post-hoc Tukey Test revealed a difference ( $p = 0.029$ ) between the densities of the lateral septum and  
118 infralimbic cortex, but only within the dopamine pathway. **I,** In adult mice the Netrin-1 pathway is maintained,  
119 however there is no longer an increasing density of Netrin-1 positive cells towards the medial prefrontal cortex.  
120 Mixed-effects ANOVA, effect of TH:  $F=54.56$ ,  $p<0.0001$ . Effect of region:  $F=1.22$ ,  $p=0.75$ . **J,** The virus injection  
121 location within the mouse brain. A Netrin-1 knockdown virus, or a control virus, was injected into the dopamine

122 pathway at the level of the dorsal peduncular cortex. **K**, Our experimental timeline: at the onset of adolescence a  
123 Netrin-1 knockdown virus, or a control virus, was injected in wild-type mice. In adulthood the mice were sacrificed  
124 and stereological measurements taken. **L**, TH+ varicosity density was quantified in the region below the injection  
125 site, the lateral septum, and in the region above the injection site, the infralimbic cortex. There was a significant  
126 decrease in TH+ varicosity density only in the infralimbic cortex. Mixed-effects ANOVA, virus by region interaction:  
127  $F=16.41$ ,  $p<0.0001$ . **M**, The experimental set-up of the final (test) stage of the Go/No-Go experiment. A mouse that  
128 has previously learned to nose-poke for a reward in response to a visual cue (illuminated nose-poke hole) must  
129 now inhibit this behaviour when the visual cue is paired with an auditory cue (acoustic tone). **N**, Mice injected with  
130 the Netrin-1 knockdown virus show improved action impulsivity compared to controls; they incur significantly  
131 fewer commission errors across the Go/No-Go task. Mixed-effects ANOVA, effect of day:  $F=68.32$ ,  $p<0.0001$ . Day  
132 by virus interaction:  $F=9.00$ ,  $p=0.0027$ . A sigmoidal curve is fit to each group of mice to determine how the two  
133 groups differ. Points indicate group means and error bars show standard error means. **O**, During the first days of  
134 Go/No-Go testing, both groups incur commission errors with high frequency, but the Netrin-1 knockdown group  
135 has fewer errors than the control group (T-test,  $t=5.18$ ,  $p<0.0001$ ). **P**, The ED50 – the inflection point in each  
136 sigmoidal curve – does not differ between groups, indicating that all mice improve their ability to inhibit their  
137 behavior at around the same time (T-test,  $t=0.97$ ,  $p=0.35$ ). **Q**, Mice microinfused with the Netrin-1 knockdown  
138 virus incur substantially fewer commission errors in the last days of the Go/No-Go task compared to mice injected  
139 with the control virus (T-test,  $t=12.38$ ,  $p<0.0001$ ). For all barplots, bars indicate group means and error bars show  
140 standard error means.

141

142 Next, we focussed on Netrin-1, a secreted protein that acts as a guidance cue to growing axons  
143 and is important for dopamine axon targeting in the nucleus accumbens in adolescence (Cuesta  
144 et al., 2020). Using unbiased stereology, we quantified the number of Netrin-1 expressing cell  
145 bodies along the dopamine axon route, and in an adjacent medial region as a control (Figure 1  
146 F, G). We found that in adolescence there are more Netrin-1 positive neurons within the



147 dopamine axon route than adjacent to it. Furthermore, along the axon route the density of  
148 Netrin-1 positive cells increases towards the medial prefrontal cortex, forming a dorsoventral  
149 gradient (Figure 1H). In adulthood, there remains a higher density of Netrin-1 positive cells  
150 along the dopamine route compared to the adjacent region, however the dorsoventral gradient  
151 is no longer present (Figure 1I).

152 To determine if Netrin-1 along the dopamine axon route is necessary for axon navigation, we  
153 silenced Netrin-1 expression in the dorsal peduncular cortex, the transition region between the  
154 septum and the medial prefrontal cortex, at the onset of adolescence (Figure 1J,K). In  
155 adulthood, we quantified the number of dopamine axon terminals in the regions below and  
156 above the injection site. Silencing Netrin-1 did not alter dopamine terminal density below the  
157 injection, in the lateral septum (Figure 1L). In the infralimbic cortex, which is the first prefrontal  
158 cortical region the axons reach after the injection site, terminal density was reduced in the  
159 Netrin-1 knock-down group compared to controls (Figure 1L). The knock-down appears to erase  
160 the Netrin-1 path to the prefrontal cortex, resulting in dopamine axons failing to reach their  
161 correct innervation target. It remains unknown whether these axons are misrouted to a  
162 different target. We conclude that Netrin-1 expressing cells “pave the way” for dopamine axons  
163 growing to the medial prefrontal cortex.

164 We next examined how the Netrin-1 pathway may be important for behaviour. Dopamine input  
165 to the prefrontal cortex is a key factor in the transition from juvenile to adult behaviours that  
166 occurs in adolescence. We hypothesized that cognitive processes involving mesocortical  
167 dopamine function would be altered when these axons are misrouted in adolescence. To test  
168 our hypothesis, we used the Go/No-Go behavioural paradigm. This test quantifies inhibitory

169 control, which matures in parallel with the innervation of dopamine axons to the prefrontal  
170 cortex in adolescence (Casey et al., 2008; Klune et al., 2021; Luna et al., 2015; Paus, 2005;  
171 Reynolds and Flores, 2021; Spear, 2000), and it is impaired in adolescent-onset disorders like  
172 depression and schizophrenia (Catts et al., 2013; Clementz et al., 2016; McTeague et al., 2016;  
173 Millan et al., 2012).

174 At the onset of adolescence, we injected the Netrin-1 silencing, or a scrambled control virus,  
175 bilaterally into the dorsal peduncular cortex; in adulthood we tested the mice in the Go/No-Go  
176 task. This paradigm first involves discrimination learning and reaction time training  
177 (Supplementary Figure 1a), followed by a Go/No-Go test consisting of “Go” trials where mice  
178 respond to a cue as previously trained and “No-Go” trials where mice must abstain from  
179 responding to the cue (Figure 1M). Correct responses to both trial types are reinforced with a  
180 food reward. We quantified the percent of “No-Go” trials where the mice incorrectly responded  
181 to the cue (“Commission Errors”) and the percent of “Go” trials where the mice correctly  
182 responded (“Rewards” or “Hits”; Supplementary Figure 1b). The ability of mice to respond  
183 correctly overall to both trial types is quantified as the Correct Response Rate (Supplementary  
184 Figure 1c) (Cuesta et al., 2019; Reynolds et al., 2018a, 2018b; Vassilev et al., 2021).

185 Mice injected with the Netrin-1 silencing virus differed from controls in their performance  
186 during “No-Go” trials. As the mice learn to withhold their responses over the course of the test,  
187 the number of commission errors they made in No-Go trials decreased in a sigmoidal fashion  
188 (Figure 1N). The upper and lower asymptotes of the sigmoidal curve quantify the number of  
189 commission errors committed during early and late test days, respectively, while the inflection  
190 point (ED50) indicates when mice start improving their ability to inhibit their behavior. At the

191 start of the Go/No part of the task, the Netrin-1 silencing group make slightly fewer commission  
192 errors (Figure 1O) than control groups, although both groups begin to improve in the No-Go  
193 task at around the same time. However, the Netrin-1 silencing group achieved a substantially  
194 higher level of behavioural inhibition, quantified as a lower percentage of commission errors in  
195 the last test days (Figure 1Q), indicating an improved ability to withhold their behaviour on cue.  
196 These behavioural results demonstrate that the maturation of action impulsivity is sensitive to  
197 the organization of the ventro-dorsal Netrin-1 path that guides mesocortical dopamine axon  
198 growth. Deviations in this route associate with striking changes in the cognitive development  
199 that is characteristic of adolescence. In this case, the deviation leads to improved action  
200 impulsivity, suggesting that these dopamine axons may end up ectopically innervating a  
201 forebrain region other than the medial prefrontal cortex, enhancing cognitive control.

202

## 203 **Part 2: UNC5C expression coincides with the onset of adolescence**

204 When axons leave the nucleus accumbens during adolescence, they follow a Netrin-1 “path”  
205 through intermediate brain regions to reach their intended innervation target. However, only a  
206 small subset of the dopamine axons that have reached the nucleus accumbens by early  
207 adolescence leave; the vast majority stay and form connections in the accumbens throughout  
208 life (Reynolds et al., 2018a). The “decision making” process of whether to “stay” (in the  
209 accumbens) or “go” (to the cortex via the Netrin-1 path) happens during a narrow  
210 developmental window at the onset of adolescence (Reynolds et al., 2018b). It remains  
211 unknown how the timing of this process is determined.

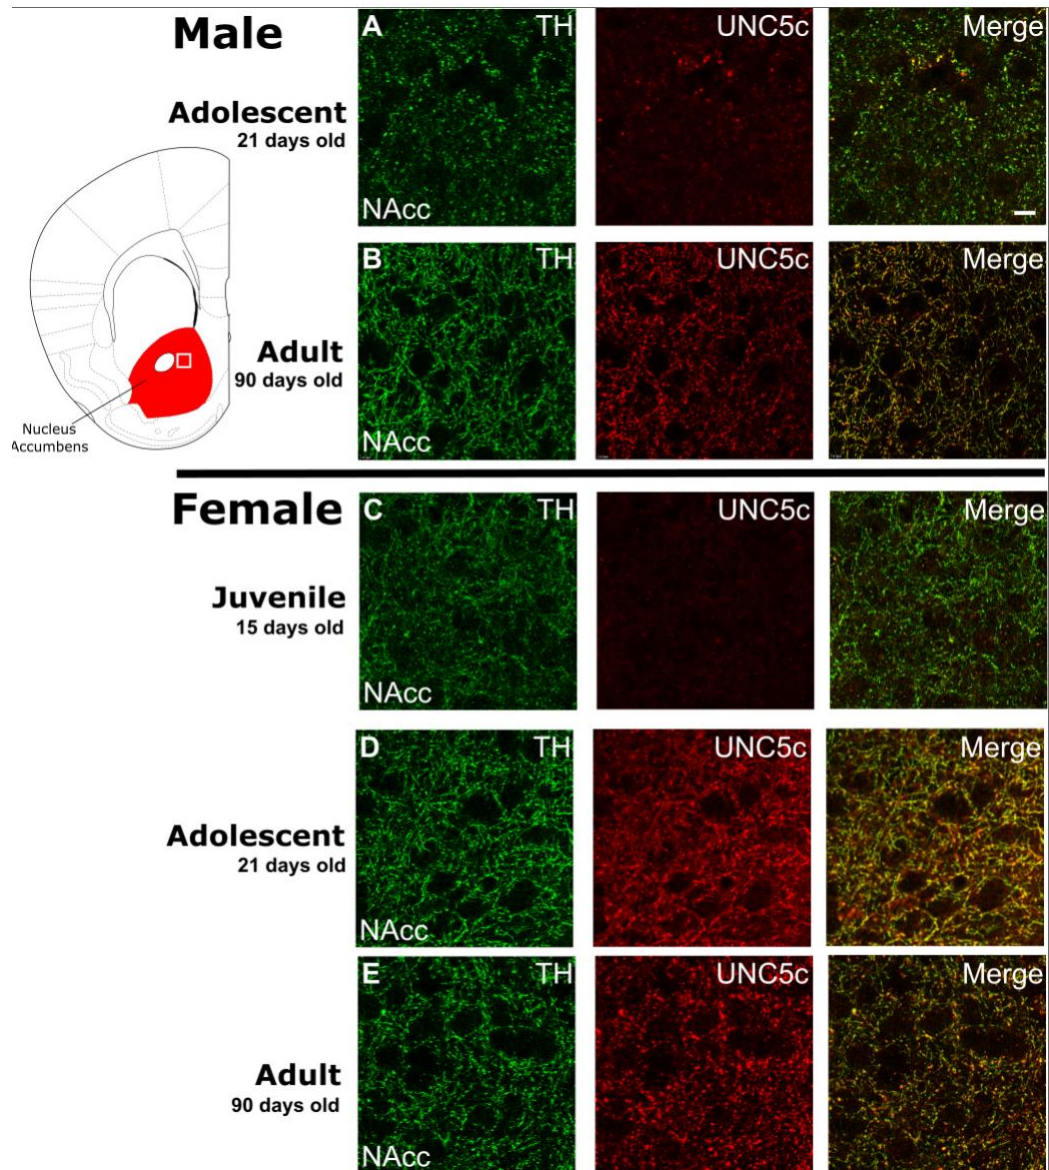

212

213 **Figure 2** The age of onset of UNC5C expression by dopamine axons in the nucleus accumbens of mice is sexually  
214 dimorphic. Images are representative of observed immunofluorescence patterns in the nucleus accumbens  
215 (approx. location highlighted as a white square in the coronal mouse brain section Plate 19, modified from Paxinos  
216 & Franklin, 2013). No qualitative differences were noted between the shell and core of the nucleus accumbens. For  
217 each row, six individuals were sampled. In males (**A-B**), UNC5C expression on dopamine fibres (here identified by  
218 immunofluorescent staining for tyrosine hydroxylase, TH) in the nucleus accumbens appears during adolescence.  
219 **A**, At the onset of adolescence (21 days old) dopamine fibres do not express UNC5C. Scale bar = 10  $\mu$ m. **B**, By

220 adulthood (90 days old), dopamine fibres express UNC5C. In females (C-E), UNC5C expression on dopamine fibres  
221 in the nucleus accumbens appears prior to adolescence. C, In juvenile (15 day old) mice, there is no UNC5C  
222 expression on dopamine fibres. D, By adolescence, dopamine fibres express UNC5C. E, In adulthood, dopamine  
223 fibres continue to express UNC5C.

224

225 In adolescence, dopamine neurons begin to express the repulsive Netrin-1 receptor UNC5C,  
226 particularly when mesolimbic and mesocortical dopamine projections segregate in the nucleus  
227 accumbens (Manitt et al., 2010; Reynolds et al., 2018a). In contrast, dopamine axons in the  
228 prefrontal cortex do not express UNC5c, except in very rare cases (Supplementary Figure 2a). In  
229 adult male mice with *Unc5c* haploinsufficiency, there appears to be ectopic growth of  
230 mesolimbic dopamine axons to the prefrontal cortex (Auger et al., 2013). This miswiring is  
231 associated with alterations in prefrontal cortex-dependent behaviours (Auger et al., 2013).

232 Using immunohistochemistry, we assessed the expression of UNC5C on nucleus accumbens  
233 dopamine axons across development. In male mice, we found little expression of UNC5C on  
234 dopamine axons at the onset of adolescence (Figure 2A), while we did find UNC5C expression  
235 on dopamine axons in adults (Figure 2B). Remarkably, when we assessed this in females, we  
236 found dopamine axons already expressing UNC5C in the nucleus accumbens at the onset of  
237 adolescence (Figure 2D), similar to adult females (figure 2E), indicating that the onset of UNC5C  
238 expression on dopamine axons in the nucleus accumbens is sexually dimorphic, with an earlier  
239 emergence in females. We examined the nucleus accumbens in pre-adolescent female mice  
240 and indeed found little UNC5C expression on dopamine axons (Figure 2C). The onset of UNC5C  
241 expression in mesocorticolimbic dopamine axons is therefore peri-adolescent but occurs earlier

242 in females than in males, consistent with the earlier emergence of adolescence in female  
243 rodents and the earlier onset of adolescence and puberty in humans (Wolf and Long, 2016).

### 244 **Part 3: Environmental control of the timing of adolescence**

245 We hypothesize that at the emergence of adolescence, UNC5C expression by dopamine axons  
246 in the nucleus accumbens signals the initiation of the growth of dopamine axons to the  
247 prefrontal cortex. We therefore examined whether the developmental timings of UNC5C  
248 expression and dopamine innervation of the prefrontal cortex are similarly affected by an  
249 environmental cue known to delay pubertal development in seasonal species.

250 Siberian hamsters (*Phodopus sungorus*) regulate many aspects of their behavior and physiology  
251 to meet the changing environmental demands of seasonality (Paul et al., 2008; Stevenson et al.,  
252 2017). In winter, they increase the thickness of their fur, exchange their brown summer coats  
253 for white winter ones, and undergo a daily torpor to conserve energy (Scherbarth and  
254 Steinlechner, 2010). In addition, adults suppress reproduction and juveniles delay puberty  
255 (Pevet, 1988; Yellon and Goldman, 1984), including developmental changes in gonadotropin  
256 releasing hormone neurons in the hypothalamus (Buchanan and Yellon, 1991; Heywood and  
257 Yellon, 1997). Reproductive organ development is delayed as part of pubertal postponement  
258 (Darrow et al., 1980; Ebling, 1994; Timonin et al., 2006). This seasonal plasticity is regulated by  
259 long or short periods of daylight (Heldmaier and Steinlechner, 1981; Hoffmann, 1978) and  
260 raises the possibility that aspects of adolescent development are sensitive to these  
261 environmental cues. To our knowledge, adaptive variation in the timing of adolescent neural  
262 development has never been recorded in any animal.

263 Here, we tested whether day length regulates *when* dopamine axons grow to the cortex, and  
264 whether the timing of UNC5C expression in the nucleus accumbens and adolescent changes in  
265 behavior are similarly affected.

266

### 267 **3.i The seasonality of adolescence**

268 Male hamsters were examined at three ages: 15 days old ( $\pm 1$ ), 80 days old ( $\pm 10$ ), and 215 days  
269 old ( $\pm 20$ ). We compared the density of the dopamine innervation to the medial prefrontal  
270 cortex in male hamsters housed under lighting conditions that replicate summer daylengths  
271 (long days, short nights) or winter daylengths (short days, long nights) (Figure 3A,B). We will  
272 refer to these two groups as “summer hamsters” and “winter hamsters” to emphasize the  
273 natural stimulus we are replicating in the laboratory environment. We confirmed that puberty  
274 is delayed in male winter hamsters compared to summer hamsters in the present experiment  
275 by measuring their gonadal weights across ages (Supplementary Figure 3a).

276 In male summer hamsters, dopamine input density to the prefrontal cortex increases during  
277 adolescence, after 15 days old and before 80 days old (Figure 3C), consistent with dopamine  
278 axon growth in mice (Manitt et al., 2013, 2011; Reynolds et al., 2018a). Prefrontal cortex  
279 dopamine innervation in summer hamsters continues to increase after 80 days old (Figure 3C).

280 In male winter hamsters, dopamine innervation to the prefrontal cortex is delayed until after 80  
281 days, which coincides with their delayed pubertal onset (Figure 3D, Supplementary Figure 3a).

282 This demonstrates that an environmental cue can determine the timing of adolescent brain  
283 development.

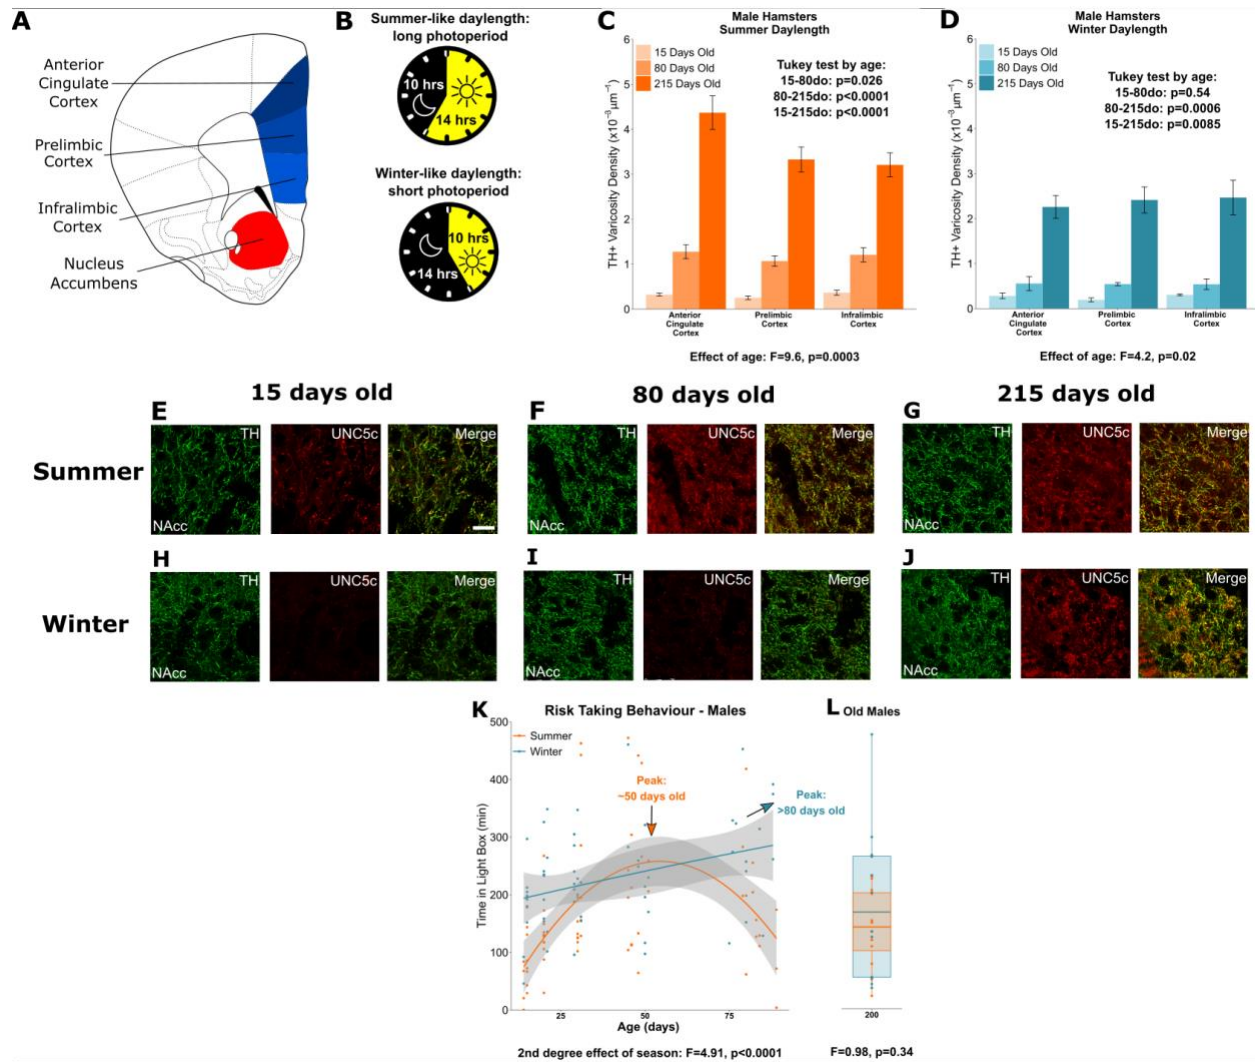

284

285 **Figure 3** Plasticity of adolescent development in male Siberian hamsters according to seasonal phenotype. All  
 286 results illustrated in this figure refer to results in male hamsters. **A**, Dopamine innervation was quantified in three  
 287 subregions of the medial prefrontal cortex, highlighted in blue. UNC5C expression was examined in the nucleus  
 288 accumbens, highlighted in red. Line drawing of a coronal section of the mouse brain was derived from Plate 19 of  
 289 Paxinos and Franklin (Paxinos and Franklin, 2013). **B**, Hamsters were housed under either summer-mimicking long  
 290 days and short nights (“summer hamsters”) or winter-mimicking short days and long nights (“winter hamsters”). **C**,  
 291 In male hamsters housed under a summer-mimicking daylength there is an increase in dopamine varicosity density  
 292 in the medial prefrontal cortex between 15 and 80 days old. Mixed-effects ANOVA, effect of age:  $F=9.6$ ,  
 293  $p=0.000255$ . Tukey Test, 15-80 days old (do):  $p=0.026$ ; 80-215do:  $p<0.0001$ ; 15-215do:  $p<0.0001$ . **D**, In male



294 hamsters housed under a winter-mimicking daylength there is no increase in dopamine varicosity density until  
295 hamsters have reached 215 days of age. Mixed-effects ANOVA, effect of age:  $F=4.17$ ,  $p=0.0205$ . Tukey Test, 15-  
296 80do:  $p=0.54$ ; 80-215do:  $p=0.0006$ ; 15-215do:  $p=0.0085$ . **E**, At 15 days old, dopamine axons (here identified by  
297 immunofluorescent staining for tyrosine hydroxylase, TH) in the nucleus accumbens of male summer-daylength  
298 hamsters largely do not express UNC5C. Scale bar = 20um (bottom right). **F-G**, At 80 (**F**) and 215 (**G**) days old,  
299 dopamine axons in the nucleus accumbens express UNC5C. **H-I**, At 15 (**H**) and 80 (**I**) days old, dopamine axons in  
300 the nucleus accumbens of male winter hamsters largely do not express UNC5C. **J**, By 215 days old there is UNC5C  
301 expression in dopamine axons in the nucleus accumbens of male winter hamsters. **E-J**, Representative images of  
302 the nucleus accumbens shell, 6 individuals were examined per group. **K**, Male hamsters house under a summer-  
303 mimicking daylength show an adolescent peak in risk taking in the light/dark box apparatus. Those raised under a  
304 winter-mimicking photoperiod show a steady increase in risk taking over the same age range. Arrows indicate the  
305 ages at which risk taking peaks in summer (orange) and winter (blue) hamsters. Polynomial regression, effect of  
306 season:  $F=3.551$ ,  $p=0.00056$ . **L**, In male hamsters, at 215 days of age, there is no difference in risk taking between  
307 hamsters raised under summer and winter photoperiods. T-test, effect of season:  $t=0.975$ ,  $p=0.341$ . For all  
308 barplots, bars indicate group means and error bars show standard error means.

309

310 We then examined UNC5C expression by dopamine axons in the nucleus accumbens in male  
311 summer and winter hamsters across age classes. UNC5C expression was apparent only after the  
312 onset of adolescence in summer hamsters (Figure 3E,F,G), as observed in male mice. However,  
313 UNC5C expression was delayed in male winter hamsters – this group did not show UNC5C  
314 expression in dopamine axons in the nucleus accumbens until after 80 days old (Figure 3H,I,J).  
315 This aligns with the delayed timing of mesocortical dopamine axon growth and pubertal onset  
316 in male winter hamsters and demonstrates that the emergence of UNC5C is a marker of  
317 adolescent onset in male mice.

318 A behavioural characteristic of adolescence is increased willingness to enter a novel  
319 environment, a behaviour that assumes an increased amount of risk (Arrant et al., 2013; Lynn  
320 and Brown, 2009). To measure this, we used the light/dark test (Bourin and Hascoët, 2003).  
321 Time spent in the light compartment is dopamine-dependent (Bahi and Dreyer, 2019; Gao and  
322 Cutler, 1993) and peaks in adolescence (Arrant et al., 2013). We will refer to this behaviour as  
323 “risk taking”. We assessed the developmental profile of risk taking in the light/dark box test in  
324 summer and winter hamsters across adolescence. In male summer hamsters, the risk taking  
325 increases across adolescence, peaks around 50 days, then subsequently declines (Figure 3K).  
326 However, the adolescent increase in risk taking is protracted in winter hamsters: across the age  
327 range examined we observe a gradual, consistent increase in risk taking rather than a peak and  
328 decline.

329 We next assessed a cohort of 215-day old hamsters, for which both summer and winter male  
330 hamsters have undergone puberty and exhibit high levels of dopamine innervation of the  
331 prefrontal cortex (Figure 3C,D,G,J, Supplementary Figure 3a). In these hamsters, we find no  
332 difference in risk taking between the male summer and winter groups (Figure 3L),  
333 demonstrating that, after 80 days, risk taking begins to decline in male winter hamsters and  
334 that by 215 days it has declined to the same level as in summer hamsters. Male hamsters raised  
335 under summer-mimicking long days and winter-mimicking short days both ultimately make the  
336 transition to the adult behavioral phenotype.

337 **3.ii An extraordinary case of decoupling puberty and adolescence**

338 In parallel with males, we conducted equivalent experiments in female hamsters (Figure 4A,B).  
 339 Under a summer-mimicking daylength, dopamine innervation to the medial prefrontal cortex  
 340 increases between 15 and 80 days old, similar to male summer hamsters (Figure 4C). There is  
 341 no further increase in innervation density after 80 days old, consistent with earlier adolescent  
 342 development in females observed in other rodent species (Juraska and Willing, 2017; Kopec et  
 343 al., 2018; Reynolds and Flores, 2021; Spear, 2000; Westbrook et al., 2018). We confirmed that  
 344 puberty is delayed in female winter hamsters compared to summer hamsters by measuring  
 345 their uterine weights (Supplementary Figure 4a) and vaginal opening (Supplementary Figure 4b)  
 346 across ages.

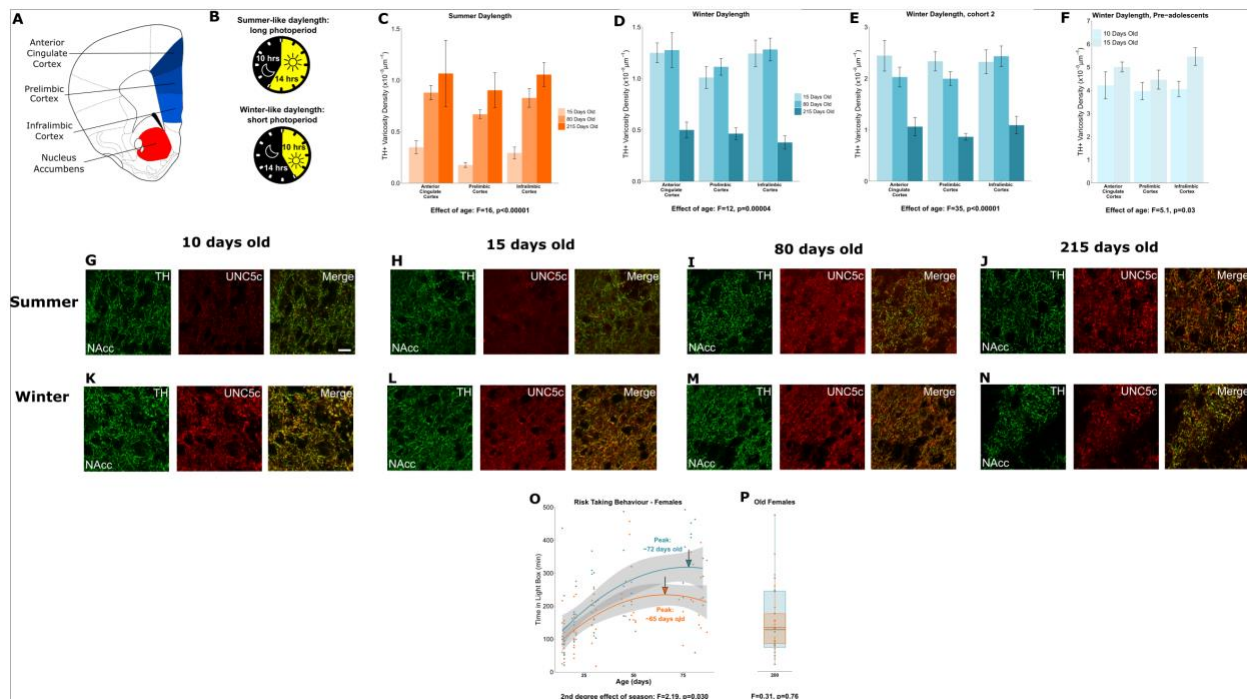

347  
 348 **Figure 4** Plasticity of adolescent development in female Siberian hamsters according to seasonal phenotype. All  
 349 results illustrated in this figure refer to results in female hamsters. **A**, Dopamine innervation was quantified in  
 350 three subregions of the medial prefrontal cortex, highlighted here in blue. UNC5C expression was examined in the  
 351 nucleus accumbens, highlighted in red. Line drawing of a coronal section of the mouse brain was derived from

352 Paxinos and Franklin (Paxinos and Franklin, 2013). **B**, Hamsters were housed under either a summer-mimicking or  
353 winter-mimicking daylength. **C**, In female hamsters housed under a summer daylength dopamine varicosity density  
354 in the medial prefrontal cortex increases between 15 and 80 days of age. Mixed-effects ANOVA, effect of age:  
355  $F=16.72$ ,  $p<0.0001$  **D**, In female hamsters housed under a winter daylength there is no increase in dopamine  
356 varicosity density post-adolescence. Instead, there is a steep decline in density between 80 and 215 days of age.  
357 Mixed-effects ANOVA, effect of age:  $F=12.33$ ,  $p=0.000043$ . **E**, As our results in panel D were unexpected, we  
358 replicated them with a second cohort of hamsters and found qualitatively identical results. Mixed-effects ANOVA,  
359 effect of age:  $F=34.871$ ,  $p<0.0001$ . **F**, To try and determine when dopamine varicosities innervate the medial  
360 prefrontal cortex, we examined a cohort of 10- and 15-day-old hamsters. We found that varicosity density  
361 increases in the medial prefrontal cortex during this time, indicating that dopamine innervation to the medial  
362 prefrontal cortex is accelerated in female winter hamsters. Mixed-effects ANOVA, effect of age:  $F=5.05$ ,  $p=0.03$ . **G**-  
363 **H**, In 10- and 15-day-old female summer hamsters there is little UNC5C expression in nucleus accumbens  
364 dopamine axons (here identified by immunofluorescent staining for tyrosine hydroxylase, TH). Sample size: 4  
365 (panel G) or 6 (panel H). **I-J**, By 80 days old (panel I), and continuing at 215 days old (panel J), dopamine axons in  
366 the nucleus accumbens express UNC5C in female summer hamsters. Sample sizes: 6. Scale bar = 20um (panel G  
367 bottom right). **K-N**, At all ages which winter female hamsters were examined, dopamine axons in the nucleus  
368 accumbens express UNC5C in winter female hamsters. Sample sizes: 4 (panel K) or 6 (panels L-N). **O**, In female  
369 hamsters, those raised under summer and winter daylengths both show an increase in risk taking over time. The  
370 winter hamsters peak later compared to the summer daylength hamsters. Arrows indicate the ages at which risk  
371 taking peaks in summer (orange) and winter (blue) hamsters. Polynomial regression, effect of season:  $F=3.305$ ,  
372  $p=0.00126$ . **P**, In female hamsters, at 215 days of age, there is no difference in risk taking between hamsters raised  
373 under summer and winter photoperiods. T-test, effect of season:  $t=0.309$ ,  $p=0.76$ . For all barplots, bars indicate  
374 group means and error bars show standard error means.

375

376 When housed under a winter-mimicking daylength, dopamine input density in the prefrontal  
377 cortex of female hamsters is *not* delayed as in males, but rather reaches adult levels prior to 15  
378 days old (Figure 4D). We replicated this unexpected finding in a separate, independent cohort  
379 of female winter hamsters (Figure 4E). This surprising result shows an intervention that  
380 accelerates adolescent cortical development.

381 We then measured dopamine axon density in female winter hamsters at two earlier ages: 10  
382 and 15 days old. Dopamine innervation increases during this period (figure 4F), well before  
383 normal adolescence and long before pubertal development. This is an extraordinary  
384 phenomenon: a key marker of adolescent neurodevelopment is accelerated and dissociated  
385 from puberty in female hamsters raised under winter-mimicking short days (Supplementary  
386 Figure 4a,4b).

387 The early increase in prefrontal cortex dopamine terminals in winter females is followed by a  
388 dramatic reduction between 80 and 215 days old (Figure 4D,E). This overlaps with the delayed  
389 timing of puberty in these females (Butler et al., 2007; Supplementary Figure 4a,4b). Synaptic  
390 pruning in the cortex is a well-known component of adolescent neural development across  
391 species (Huttenlocher, 1984; Koss et al., 2013; Petanjek et al., 2011). Under normal conditions,  
392 the effect of pruning on dopamine synapses is likely masked by the growth of new dopamine  
393 axons to the prefrontal cortex (Manitt et al., 2013, 2011; Reynolds et al., 2018a). In the case of  
394 female winter hamsters, we hypothesize that the growth of dopamine axons to the prefrontal  
395 cortex occurs early while synaptic pruning, including of dopamine synapses, appears to occur  
396 later. This leads to a remarkable dissociation between two cortical developmental processes  
397 that are normally simultaneous, the behavioural implications of which are unclear.

398 If the developmental onset of UNC5C expression determines the timing of dopamine  
399 innervation of the prefrontal cortex, then onset of UNC5C expression should also be advanced  
400 in female winter hamsters. Hence, we examined UNC5C expression at the same ages as we  
401 examined dopamine axon growth in female hamsters. At 10 and 15 days old, UNC5C  
402 expression is present *only* in the winter hamsters (Figure 4G,H,K,L), but at 80 and 215 days old,  
403 UNC5C expression is apparent in both summer and winter hamsters (Figure 4I,J,M,N).

404 We used the light/dark box test to examine potential risk taking implications of the  
405 extraordinary developmental trajectory we observed in the prefrontal cortex of female  
406 hamsters. In female summer and winter hamsters, the adolescent increase and peak in risk  
407 taking occurs between the ages of 15 and 80 days, as it does in summer daylength males  
408 (Figure 4O). However, contrary to what we would expect, the peak in winter females is delayed  
409 compared to summer females. When we assessed an independent cohort of 215-day-old  
410 female hamsters, we found no difference in risk taking between groups (Figure 4R), indicating  
411 that, like males, female summer and winter hamsters both eventually reach the same adult  
412 level of risk taking.

413 In both sexes, hamsters housed under a summer-mimicking daylength showed an adolescent  
414 peak in risk taking at an age that we would predict based on results from other rodents (Arrant  
415 et al., 2013; Pietropaolo et al., 2004; Tanaka, 2015). When raised under a winter-mimicking  
416 daylength, hamsters of either sex show a protracted peak in risk taking. In males, it is delayed  
417 beyond 80 days old, but the delay is substantially less in females. This is a counterintuitive  
418 finding considering that dopamine development in winter females appears to be accelerated.  
419 Our interpretation of this finding is that the timing of the risk taking peak in females may reflect

420 a balance between different adolescent developmental processes. The fact that dopamine axon  
421 growth is accelerated does not imply that all adolescent maturational processes are  
422 accelerated. Some may be delayed, for example those that induce axon pruning in the cortex.  
423 The timing of the risk taking peak in winter female hamsters may therefore reflect the  
424 amalgamation of developmental processes that are advanced with those that are delayed –  
425 producing a behavioural effect that is timed somewhere in the middle. Disentangling the effects  
426 of different developmental processes on behaviour will require further experiments in  
427 hamsters, including the direct manipulation of dopamine activity in the nucleus accumbens and  
428 prefrontal cortex.

## 429 **Conclusion**

430 Here we describe how the gradual growth of mesocortical dopamine axons marks adolescent  
431 development, and how this process uses guidance cues and is sensitive to sex and environment.  
432 Netrin-1 signalling provides the “stay-or-go” “decision making” conducted by dopamine axons  
433 that innervate the nucleus accumbens at the onset of adolescence (Cuesta et al., 2020). UNC5C  
434 expression by these dopamine axons marks the timing at which this decision is made. In mice,  
435 UNC5C expression coincides with sex differences in both adolescent and pubertal development.  
436 Females, which develop earlier, show earlier UNC5C expression in dopamine axons compared  
437 to males.

438 In hamsters, behavioural and developmental shifts in response to environmental cues occur in  
439 parallel with alterations in the timing of dopamine axon growth. As we show here, male  
440 hamsters raised under a winter-mimicking daylength delay not only puberty, but also

441 adolescent dopamine and behavioural maturation. In contrast, female hamsters under identical  
442 conditions delay puberty but accelerate dopamine axon growth, a key marker of adolescent  
443 brain development. Behavioural shifts during adolescence appear to be delayed in these  
444 females, but less substantially than in male hamsters. Notably, under all conditions, the  
445 developmental timing of UNC5C expression corresponds to the timing of dopamine innervation  
446 of the prefrontal cortex.

447 In both mice and hamsters, the emergence of UNC5C expression coincides with the onset of  
448 dopamine axon growth to the prefrontal cortex, a key characteristic of the adolescent transition  
449 period. While previously we have shown that the Netrin-1 signalling in the nucleus accumbens  
450 is responsible for coordinating *whether* dopamine axons grow in adolescence (Reynolds and  
451 Flores, 2021), here we propose that Netrin-1 signalling is also key to determining *how* and *when*  
452 this marker of adolescence occurs.

### 453 **Acknowledgments**

454 We are grateful for the technical assistance of the Pathology Core, Centre for Phenogenomics,  
455 Toronto, Canada, and in particular Milan Ganguly and Gregory Ossetchkine, for their excellent  
456 histological assistance. Furthermore, we are grateful to Helen Cooper and Philip Vassilev for  
457 their critical and insightful readings of our manuscript.

458 Author contributions (Brand et al., 2015):

459       Conceptualization: DH, MJP, CF

460       Data Curation: DH

461       Formal Analysis: DH

462       Investigation: DH, RFK, SS, EE, AH, TO, AD, CP, JZ, KCS, LPL, QEC



463 Investigation (post-review experiments): DM, RGA  
464 Methodology: DH, MJP, CF  
465 Resources: GL, MJP, CF  
466 Supervision: DH, MJP, CF  
467 Validation: DH  
468 Visualization: DH  
469 Visualization (post-review experiments): DH, DM, RGA  
470 Writing—original draft: DH  
471 Writing—review & editing: DH, MJP, CF  
472 Funding:  
  
473 National Institute on Drug Abuse grant R01DA037911 (CF)  
474 Canadian Institutes of Health Research FRN: 156272 (CF)  
475 Canadian Institutes of Health Research FRN: 170130 (CF)  
476 National Science and Engineering Research Council of Canada RGPIN-2020-04703 (CF)  
477 National Science Foundation IOS-1754878 (MJP)  
478 National Science and Engineering Research Council of Canada PGSD3-415253-2012 (DH)  
479 Quebec Nature and Technology Research Fund 208332 (DH)  
480 National Science and Engineering Research Council of Canada PDF5171462018 (DH)  
481 McGill-Douglas Max Planck Institute of Psychiatry International Collaborative Initiative in  
482 Adversity and Mental Health, an international partnership funded by the Healthy Brains  
483 for Healthy Lives initiative (RGA)  
484  
  
485 Competing interests: Authors declare that they have no competing interests.  
  
486 Data and code availability: All data and code use in these analyses are available through the  
487 Open Science Framework (DIO 10.17605/OSF.IO/DU3H4).  
  
488 **References**

- 489  
490
- 491 Arrant AE, Schramm-Sapyta NL, Kuhn CM. 2013. Use of the light/dark test for anxiety in adult  
492 and adolescent male rats. *Behav Brain Res* **256**:119–127. doi:10.1016/j.bbr.2013.05.035
- 493 Auger ML, Schmidt ERE, Manitt C, Dal-Bo G, Pasterkamp RJ, Flores C. 2013. unc5c  
494 haploinsufficient phenotype: striking similarities with the dcc haploinsufficiency model.  
495 *European Journal of Neuroscience* **38**:2853–2863. doi:10.1111/ejn.12270
- 496 Bahi A, Dreyer J-L. 2019. Dopamine transporter (DAT) knockdown in the nucleus accumbens  
497 improves anxiety- and depression-related behaviors in adult mice. *Behav Brain Res* **359**:104–  
498 115. doi:10.1016/j.bbr.2018.10.028
- 499 Bourin M, Hascoët M. 2003. The mouse light/dark box test. *Eur J Pharmacol* **463**:55–65.  
500 doi:10.1016/s0014-2999(03)01274-3
- 501 Brand A, Allen L, Altman M, Hlava M, Scott J. 2015. Beyond authorship: attribution,  
502 contribution, collaboration, and credit. *Learn Publ* **28**:151–155. doi:10.1087/20150211
- 503 Buchanan KL, Yellon SM. 1991. Delayed Puberty in the Male Djungarian Hamster: Effect of Short  
504 Photoperiod or Melatonin Treatment on the GnRH Neuronal System. *Neuroendocrinology*  
505 **54**:96–102. doi:10.1159/000125857
- 506 Casey BJ, Jones RM, Hare TA. 2008. The Adolescent Brain. *Annals of the New York Academy of*  
507 *Sciences* **1124**:111–126. doi:10.1196/annals.1440.010
- 508 Catts VS, Fung SJ, Long LE, Joshi D, Vercammen A, Allen KM, Fillman SG, Rothmond DA, Sinclair  
509 D, Tiwari Y, Tsai S-Y, Weickert TW, Weickert CS. 2013. Rethinking schizophrenia in the  
510 context of normal neurodevelopment. *Front Cell Neurosci* **7**:60.  
511 doi:10.3389/fncel.2013.00060
- 512 Clementz BA, Sweeney JA, Hamm JP, Ivleva EI, Ethridge LE, Pearlson GD, Keshavan MS,  
513 Tamminga CA. 2016. Identification of Distinct Psychosis Biotypes Using Brain-Based  
514 Biomarkers. *Am J Psychiat* **173**:373–384. doi:10.1176/appi.ajp.2015.14091200
- 515 Cuesta S, Nouel D, Reynolds LM, Morgunova A, Torres-Berrío A, White A, Hernandez G, Cooper  
516 HM, Flores C. 2020. Dopamine Axon Targeting in the Nucleus Accumbens in Adolescence  
517 Requires Netrin-1. *Frontiers Cell Dev Biology* **8**:487. doi:10.3389/fcell.2020.00487
- 518 Cuesta S, Restrepo-Lozano J-M, Popescu C, He S, Reynolds LM, Israel S, Hernandez G, Rais R,  
519 Slusher BS, Flores C. 2019. DCC-related developmental effects of abused- versus therapeutic-  
520 like amphetamine doses in adolescence. *Addiction Biology* **24**:e12791-11.  
521 doi:10.1111/adb.12791

- 522 Darrow JM, Davis FC, Elliott JA, Stetson MH, Turek FW, Menaker M. 1980. Influence of  
523 Photoperiod on Reproductive Development in the Golden Hamster. *Biol Reprod* **22**:443–450.  
524 doi:10.1095/biolreprod22.3.443
- 525 Drzewiecki CM, Juraska JM. 2020. The structural reorganization of the prefrontal cortex during  
526 adolescence as a framework for vulnerability to the environment. *Pharmacol Biochem Be*  
527 **199**:173044. doi:10.1016/j.pbb.2020.173044
- 528 Ebling FJP. 1994. Photoperiodic Differences during Development in the Dwarf Hamsters  
529 Phodopus sungorus and Phodopus campbelli. *Gen Comp Endocrinol* **95**:475–482.  
530 doi:10.1006/gcen.1994.1147
- 531 Fuhrmann D, Knoll LJ, Blakemore S-J. 2015. Adolescence as a Sensitive Period of Brain  
532 Development. *Trends in Cognitive Sciences* **19**:558–566. doi:10.1016/j.tics.2015.07.008
- 533 Gao B, Cutler MG. 1993. Effects of quinpirole on the behaviour shown by mice in the light-dark  
534 box and during social interactions. *Neuropharmacology* **32**:93–100. doi:10.1016/0028-  
535 3908(93)90134-o
- 536 Gogtay N, Giedd JN, Lusk L, Hayashi KM, Greenstein D, Vaituzis AC, Nugent TF, Herman DH,  
537 Clasen LS, Toga AW, Rapoport JL, Thompson PM. 2004. Dynamic mapping of human cortical  
538 development during childhood through early adulthood. *Proceedings of the National*  
539 *Academy of Sciences* **101**:8174–8179. doi:10.1073/pnas.0402680101
- 540 Heldmaier G, Steinlechner S. 1981. Seasonal pattern and energetics of short daily torpor in the  
541 Djungarian hamster, Phodopus sungorus. *Oecologia* **48**:265–270. doi:10.1007/bf00347975
- 542 Heywood SG, Yellon SM. 1997. Gonadotropin-Releasing Hormone Neural Projections to the  
543 Systemic Vasculature during Sexual Maturation and Delayed Puberty in the Male Djungarian  
544 Hamster. *Biol Reprod* **57**:873–878. doi:10.1095/biolreprod57.4.873
- 545 Hoffmann K. 1978. Effects of short photoperiods on puberty, growth and moult in the  
546 Djungarian hamster (Phodopus sungorus). *Journal of Reproduction and Fertility* **54**:29–35.  
547 doi:10.1530/jrf.0.0540029
- 548 Hollenstein T, Loughheed JP. 2013. Beyond Storm and Stress. *Am Psychol* **68**:444–454.  
549 doi:10.1037/a0033586
- 550 Hoops D, Flores C. 2017. Making Dopamine Connections in Adolescence. *Trends in*  
551 *Neurosciences* 1–11. doi:10.1016/j.tins.2017.09.004
- 552 Hoops D, Reynolds LM, Restrepo-Lozano J-M, Flores C. 2018. Dopamine Development in the  
553 Mouse Orbital Prefrontal Cortex Is Protracted and Sensitive to Amphetamine in  
554 Adolescence. *eNeuro* **5**:ENEURO.0372-17.2017-9. doi:10.1523/eneuro.0372-17.2017

- 555 Huttenlocher PR. 1984. Synapse elimination and plasticity in developing human cerebral cortex.  
556 *American journal of mental deficiency* **88**:488–496.
- 557 Juraska JM, Willing J. 2017. Pubertal onset as a critical transition for neural development and  
558 cognition. *Brain Research* **1654**:87–94. doi:10.1016/j.brainres.2016.04.012
- 559 Keshavan MS, Giedd J, Lau JYF, Lewis DA, Paus T. 2014. Changes in the adolescent brain and the  
560 pathophysiology of psychotic disorders. *Lancet Psychiatry* **1**:549–558. doi:10.1016/s2215-  
561 0366(14)00081-9
- 562 Kessler RC, Amminger GP, Aguilar-Gaxiola S, Alonso J, Lee S, Üstün TB. 2007. Age of onset of  
563 mental disorders; a review of recent literature. *Curr Opin Psychiatr* **20**:359–364.  
564 doi:10.1097/yco.0b013e32816ebc8c
- 565 Kessler RC, Berglund P, Demler O, Jin R, Merikangas KR, Walters EE. 2005. Lifetime Prevalence  
566 and Age-of-Onset Distributions of DSM-IV Disorders in the National Comorbidity Survey  
567 Replication. *Arch Gen Psychiat* **62**:593–602. doi:10.1001/archpsyc.62.6.593
- 568 Kim SR, Chen X, Oo TF, Kareva T, Yarygina O, Wang C, Doring M, Kholodilov N, Burke RE. 2011.  
569 Dopaminergic pathway reconstruction by Akt/Rheb-induced axon regeneration. *Annals of*  
570 *Neurology* **70**:110–120. doi:10.1002/ana.22383
- 571 Klune CB, Jin B, DeNardo LA. 2021. Linking mPFC circuit maturation to the developmental  
572 regulation of emotional memory and cognitive flexibility. *Elife* **10**:e64567.  
573 doi:10.7554/elife.64567
- 574 Kopec AM, Smith CJ, Ayre NR, Sweat SC, Bilbo SD. 2018. Microglial dopamine receptor  
575 elimination defines sex-specific nucleus accumbens development and social behavior in  
576 adolescent rats. *Nat Commun* **9**:3769. doi:10.1038/s41467-018-06118-z
- 577 Koss WA, Belden CE, Hristov AD, Juraska JM. 2013. Dendritic remodeling in the adolescent  
578 medial prefrontal cortex and the basolateral amygdala of male and female rats. *Synapse*  
579 **68**:61–72. doi:10.1002/syn.21716
- 580 Larsen B, Luna B. 2018. Adolescence as a neurobiological critical period for the development of  
581 higher-order cognition. *Neurosci Biobehav Rev* **94**:179–195.  
582 doi:10.1016/j.neubiorev.2018.09.005
- 583 Lee FS, Heimer H, Giedd JN, Lein ES, Sestan N, Weinberger DR, Casey BJ. 2014. Mental health.  
584 Adolescent mental health-opportunity and obligation. *Science* **346**:547–549.  
585 doi:10.1126/science.1260497

- 586 Luna B, Marek S, Larsen B, Tervo-Clemmens B, Chahal R. 2015. An integrative model of the  
587 maturation of cognitive control. *Annual review of neuroscience* **38**:151–170.  
588 doi:10.1146/annurev-neuro-071714-034054
- 589 Lynn DA, Brown GR. 2009. The ontogeny of exploratory behavior in male and female adolescent  
590 rats (*Rattus norvegicus*). *Dev Psychobiol* **51**:513–520. doi:10.1002/dev.20386
- 591 Manitt C, Eng C, Pokinko M, Ryan RT, Torres-Berrío A, Lopez JP, Yogendran SV, Daubaras MJJ,  
592 Grant A, Schmidt ERE, Tronche F, Krimpenfort P, Cooper HM, Pasterkamp RJ, Kolb B, Turecki  
593 G, Wong TP, Nestler EJ, Giros B, Flores C. 2013. dcc orchestrates the development of the  
594 prefrontal cortex during adolescence and is altered in psychiatric patients. *Translational*  
595 *Psychiatry* **3**:e338-13. doi:10.1038/tp.2013.105
- 596 Manitt C, Labelle-Dumais C, Eng C, Grant A, Mimee A, Stroh T, Flores C. 2010. Peri-Pubertal  
597 Emergence of UNC-5 Homologue Expression by Dopamine Neurons in Rodents. *PLoS ONE*  
598 **5**:e11463-14. doi:10.1371/journal.pone.0011463
- 599 Manitt C, Mimee A, Eng C, Pokinko M, Stroh T, Cooper HM, Kolb B, Flores C. 2011. The Netrin  
600 Receptor DCC Is Required in the Pubertal Organization of Mesocortical Dopamine Circuitry. *J*  
601 *Neurosci* **31**:8381–8394. doi:10.1523/jneurosci.0606-11.2011
- 602 McTeague LM, Goodkind MS, Etkin A. 2016. Transdiagnostic impairment of cognitive control in  
603 mental illness. *J Psychiatr Res* **83**:37–46. doi:10.1016/j.jpsychires.2016.08.001
- 604 Millan MJ, Agid Y, Brüne M, Bullmore ET, Carter CS, Clayton NS, Connor R, Davis S, Deakin B,  
605 DeRubeis RJ, Dubois B, Geyer MA, Goodwin GM, Gorwood P, Jay TM, Joëls M, Mansuy IM,  
606 Meyer-Lindenberg A, Murphy D, Rolls E, Saletu B, Spedding M, Sweeney J, Whittington M,  
607 Young LJ. 2012. Cognitive dysfunction in psychiatric disorders: characteristics, causes and the  
608 quest for improved therapy. *Nat Rev Drug Discov* **11**:141–168. doi:10.1038/nrd3628
- 609 Paus T. 2005. Mapping brain maturation and cognitive development during adolescence. *Trends*  
610 *in Cognitive Sciences* **9**:60–68. doi:10.1016/j.tics.2004.12.008
- 611 Paxinos G, Franklin KBJ. 2013. *The Mouse Brain in Stereotaxic Coordinates*, 4th ed, Academic  
612 Press. Academic Press.
- 613 Petanjek Z, Judas M, Simic G, Rasin MR, Uylings HBM, Rakic P, Kostovic I. 2011. Extraordinary  
614 neoteny of synaptic spines in the human prefrontal cortex. *Proceedings of the National*  
615 *Academy of Sciences* **108**:13281–13286. doi:10.1073/pnas.1105108108
- 616 Pevet P. 1988. The role of the pineal gland in the photoperiodic control of reproduction in  
617 different hamster species. *Reproduction Nutrition Développement* **28**:443–458.  
618 doi:10.1051/rnd:19880310

- 619 Pietropaolo S, Branchi I, Cirulli F, Chiarotti F, Aloe L, Alleva E. 2004. Long-term effects of the  
620 periadolescent environment on exploratory activity and aggressive behaviour in mice: social  
621 versus physical enrichment. *Physiol Behav* **81**:443–453. doi:10.1016/j.physbeh.2004.02.022
- 622 Reynolds LM, Flores C. 2021. Mesocorticolimbic Dopamine Pathways Across Adolescence:  
623 Diversity in Development. *Front Neural Circuit* **15**:735625. doi:10.3389/fncir.2021.735625
- 624 Reynolds LM, Pokinko M, Torres-Berrío A, Cuesta S, Lambert LC, Pellitero EDC, Wodzinski M,  
625 Manitt C, Krimpenfort P, Kolb B, Flores C. 2018a. DCC Receptors Drive Prefrontal Cortex  
626 Maturation by Determining Dopamine Axon Targeting in Adolescence. *Biological psychiatry*  
627 **83**:181–192. doi:10.1016/j.biopsych.2017.06.009
- 628 Reynolds LM, Yetnikoff L, Pokinko M, Wodzinski M, Epelbaum JG, Lambert LC, Cossette M-P,  
629 Arvanitogiannis A, Flores C. 2018b. Early Adolescence is a Critical Period for the Maturation  
630 of Inhibitory Behavior. *Cerebral cortex* **29**:3676–3686. doi:10.1093/cercor/bhy247
- 631 Scherbarth F, Steinlechner S. 2010. Endocrine mechanisms of seasonal adaptation in small  
632 mammals: from early results to present understanding. *J Comp Physiology B* **180**:935–952.  
633 doi:10.1007/s00360-010-0498-2
- 634 Sowell ER, Thompson PM, Toga AW. 2004. Mapping Changes in the Human Cortex throughout  
635 the Span of Life. *Neurosci* **10**:372–392. doi:10.1177/1073858404263960
- 636 Spear LP. 2000. The adolescent brain and age-related behavioral manifestations. *Neurosci*  
637 *Biobehav Rev* **24**:417–463.
- 638 Tanaka T. 2015. Sex differences in exploratory behaviour of laboratory CD-1 mice (*Mus*  
639 *musculus*). *Scandinavian Journal of Laboratory Animal Science* **41**:1–9.
- 640 Timonin ME, Place NJ, Wanderi E, Wynne-Edwards KE. 2006. *Phodopus campbelli* detect  
641 reduced photoperiod during development but, unlike *Phodopus sungorus*, retain functional  
642 reproductive physiology. *Reproduction* **132**:661–670. doi:10.1530/rep.1.00019
- 643 Vassilev P, Pantoja-Urban AH, Giroux M, Nouel D, Hernandez G, Orsini T, Flores C. 2021. Unique  
644 effects of social defeat stress in adolescent male mice on the Netrin-1/DCC pathway,  
645 prefrontal cortex dopamine and cognition (Social stress in adolescent vs. adult male mice).  
646 *Eneuro* ENEURO.0045-21.2021. doi:10.1523/eneuro.0045-21.2021
- 647 Westbrook SR, Hankosky ER, Dwyer MR, Gulley JM. 2018. Age and Sex Differences in Behavioral  
648 Flexibility, Sensitivity to Reward Value, and Risky Decision-Making. *Behav Neurosci* **132**:75–  
649 87. doi:10.1037/bne0000235
- 650 Wolf RM, Long D. 2016. Pubertal Development. *Pediatr Rev* **37**:292–300. doi:10.1542/pir.2015-  
651 0065

652 Yellon SM, Goldman BD. 1984. Photoperiod Control of Reproductive Development in the Male  
653 Djungarian Hamster (*Phodopus sungorus*)\* | Endocrinology | Oxford Academic.  
654 *academic.oup.com*.

655
